# Supplementary material for: Adjusting the Structure of β-Cyclodextrin to Improve Complexation of Anthraquinone-Derived Drugs
Source: MDPI journal article supplement (doi:10.3390/molecules26237205), 2021-11-27
Supplement: s1 [file s1]

## Adjusting the Structure of $\beta$ -Cyclodextrin to Improve Complexation of Anthraquinone-Derived Drugs

Agata Krzak<sup>1,2</sup>, Olga Swiech<sup>1,2\*</sup>, Maciej Majdecki<sup>3</sup>, Piotr Garbacz<sup>1</sup>, Paulina Gwardys<sup>1</sup>, Renata Bilewicz<sup>1,2\*</sup>

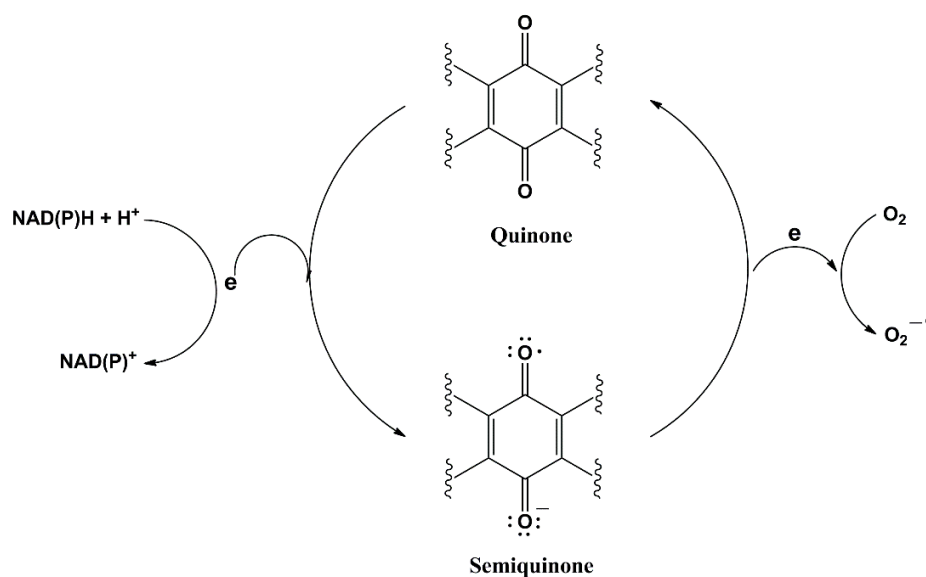

**Scheme S1.** Reactive oxygen species (ROS) production in the presence of NADH.

### NMR measurements

The acquired NMR spectra of  $\beta$ -CD complexes are listed in Table S1. <sup>1</sup>H NMR signals of aromatic protons of the ligands, *i.e.*, AQ2S and AQ2CA (Figs. S4 and S8), almost do not overlap with the <sup>1</sup>H NMR signals of  $\beta$ -CDGAL (Fig. 1). Therefore, the <sup>1</sup>H NMR signals of aromatic protons are the most favorable for analyzing the complexes' structures (Figs. S6 and S10). In the case of DNR, there is a partial overlapping of the NOESY cross-peaks of DNR protons and those due to the interaction between  $\beta$ -CDGAL and DNR (see Figs S12–15). This overlapping hinders the unequivocal assignment of the signals. <sup>1</sup>H NMR of AQ2CA was recorded in DMSO-*d*<sub>6</sub> due to its very low solubility in water.

**Table S1.** NMR spectra of  $\beta$ -CD complexes given in the supporting material.

| Spectrum | Measurement        | Sample composition |       |
|----------|--------------------|--------------------|-------|
| S1       | $^1\text{H}$       | $\beta$ -CDGAL     |       |
| S2       | $^1\text{H}$ NOESY |                    |       |
| S3       |                    |                    |       |
| S4       | $^1\text{H}$       | $\beta$ -CDGAL     | AQ2S  |
| S5       | $^1\text{H}$       |                    | AQ2S  |
| S6       | $^1\text{H}$ NOESY |                    |       |
| S7       |                    |                    |       |
| S8       | $^1\text{H}$       | $\beta$ -CDGAL     | AQ2CA |
| S9       | $^1\text{H}$       |                    | AQ2CA |
| S10      | $^1\text{H}$ NOESY |                    |       |
| S11      |                    |                    |       |
| S12      | $^1\text{H}$       |                    | DNR   |
| S13      | $^1\text{H}$ NOESY |                    |       |
| S14      | $^1\text{H}$       | $\beta$ -CDGAL     | DNR   |
| S15      | $^1\text{H}$ NOESY |                    |       |

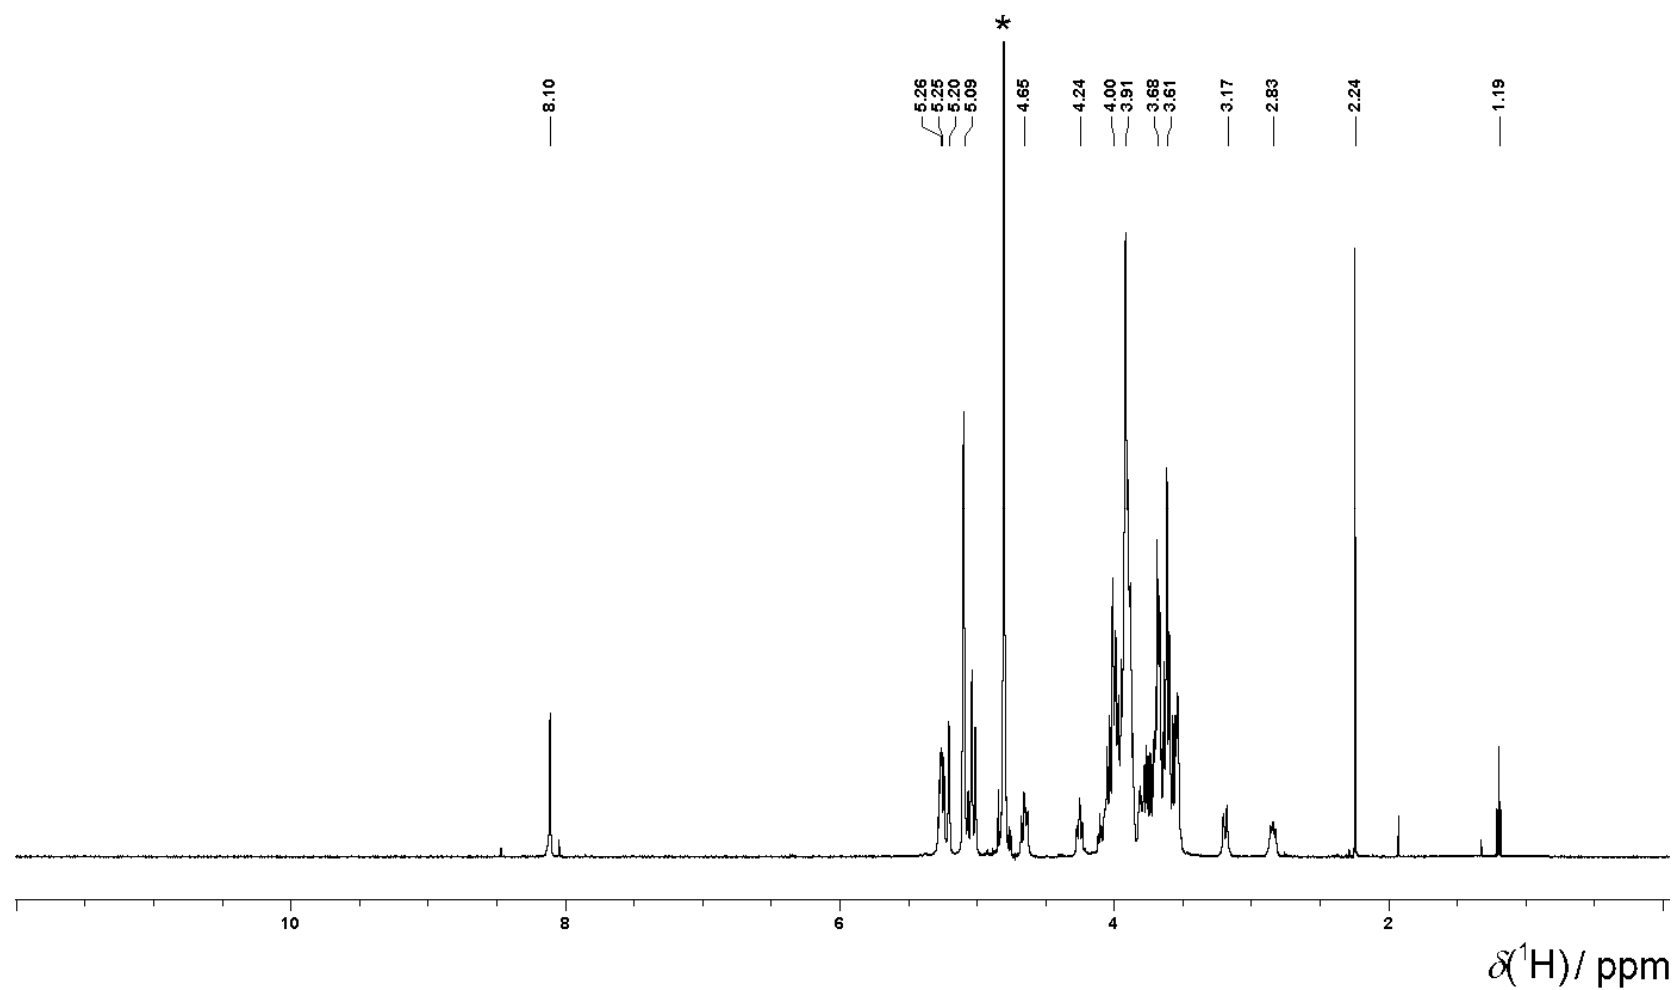

**Figure S1.**  $^1\text{H}$  NMR spectrum of  $\beta$ -cyclodextrin functionalized by galactosamine ( $\beta$ -CDGAL) dissolved in  $\text{D}_2\text{O}$ . The residual solvent peak at  $\delta(^1\text{H}) = 4.79$  ppm is marked by an asterisk.

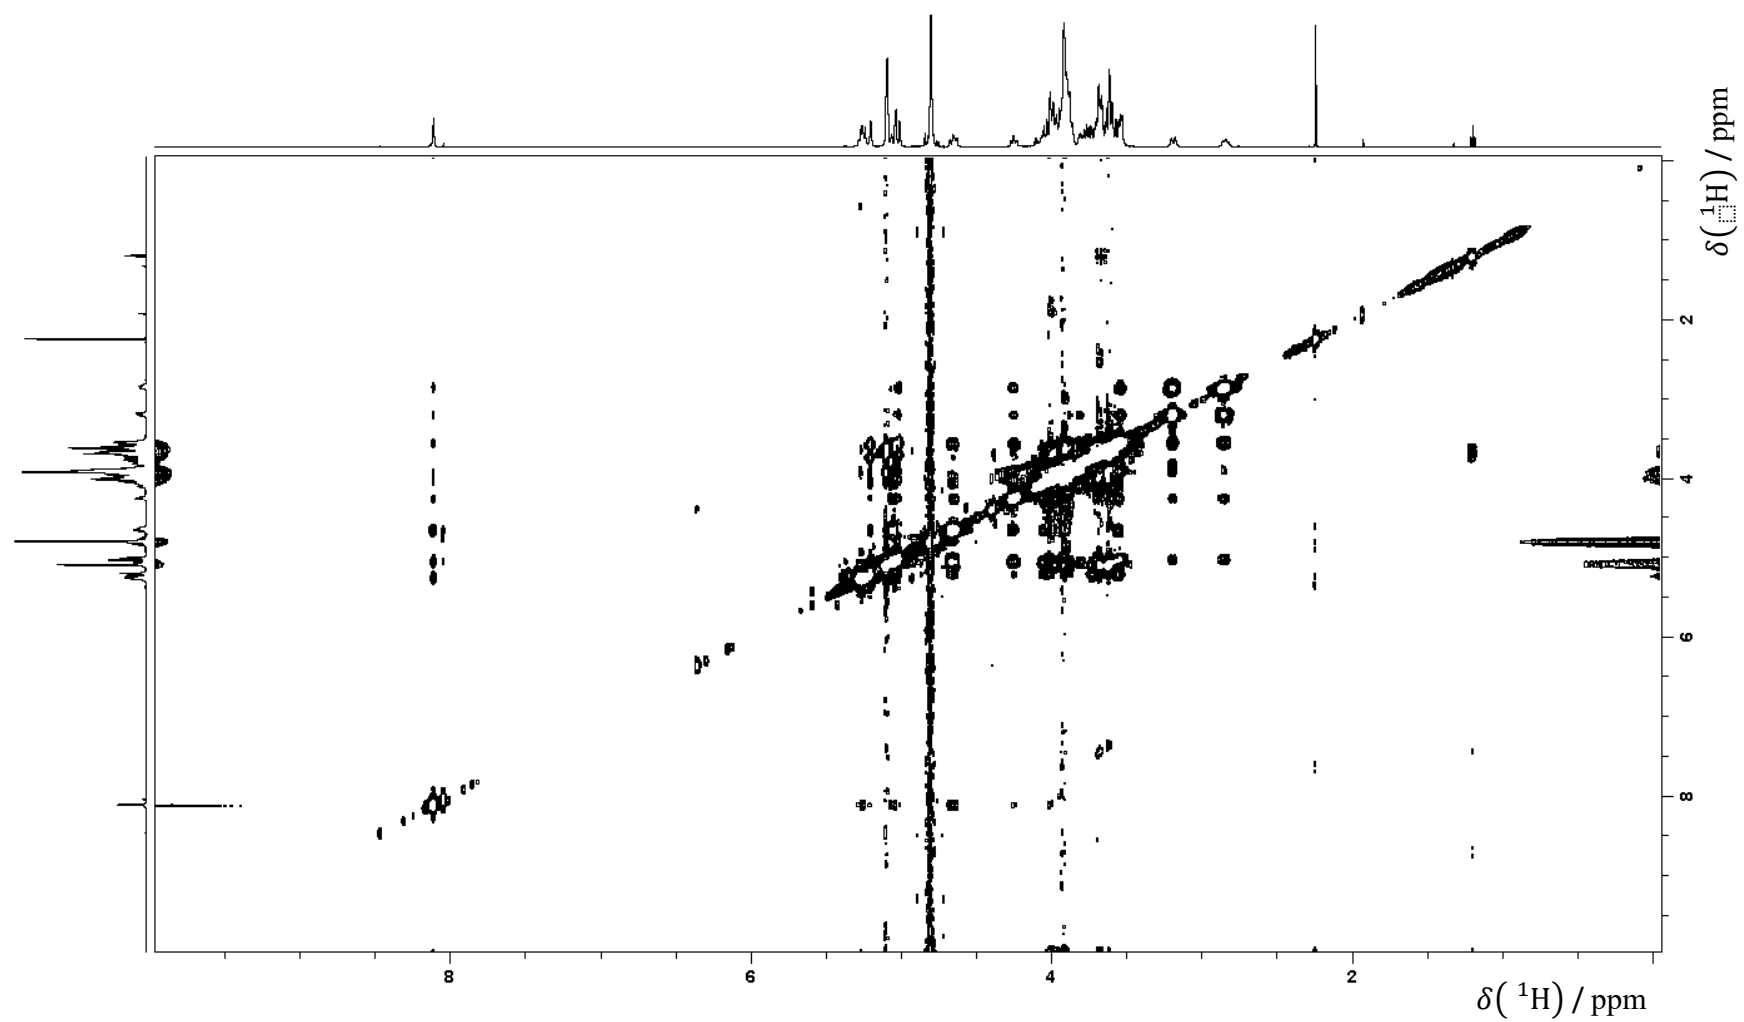

**Figure S2.**  $^1\text{H}$  NOESY spectrum of  $\beta$ -CDGAL dissolved in  $\text{D}_2\text{O}$ .

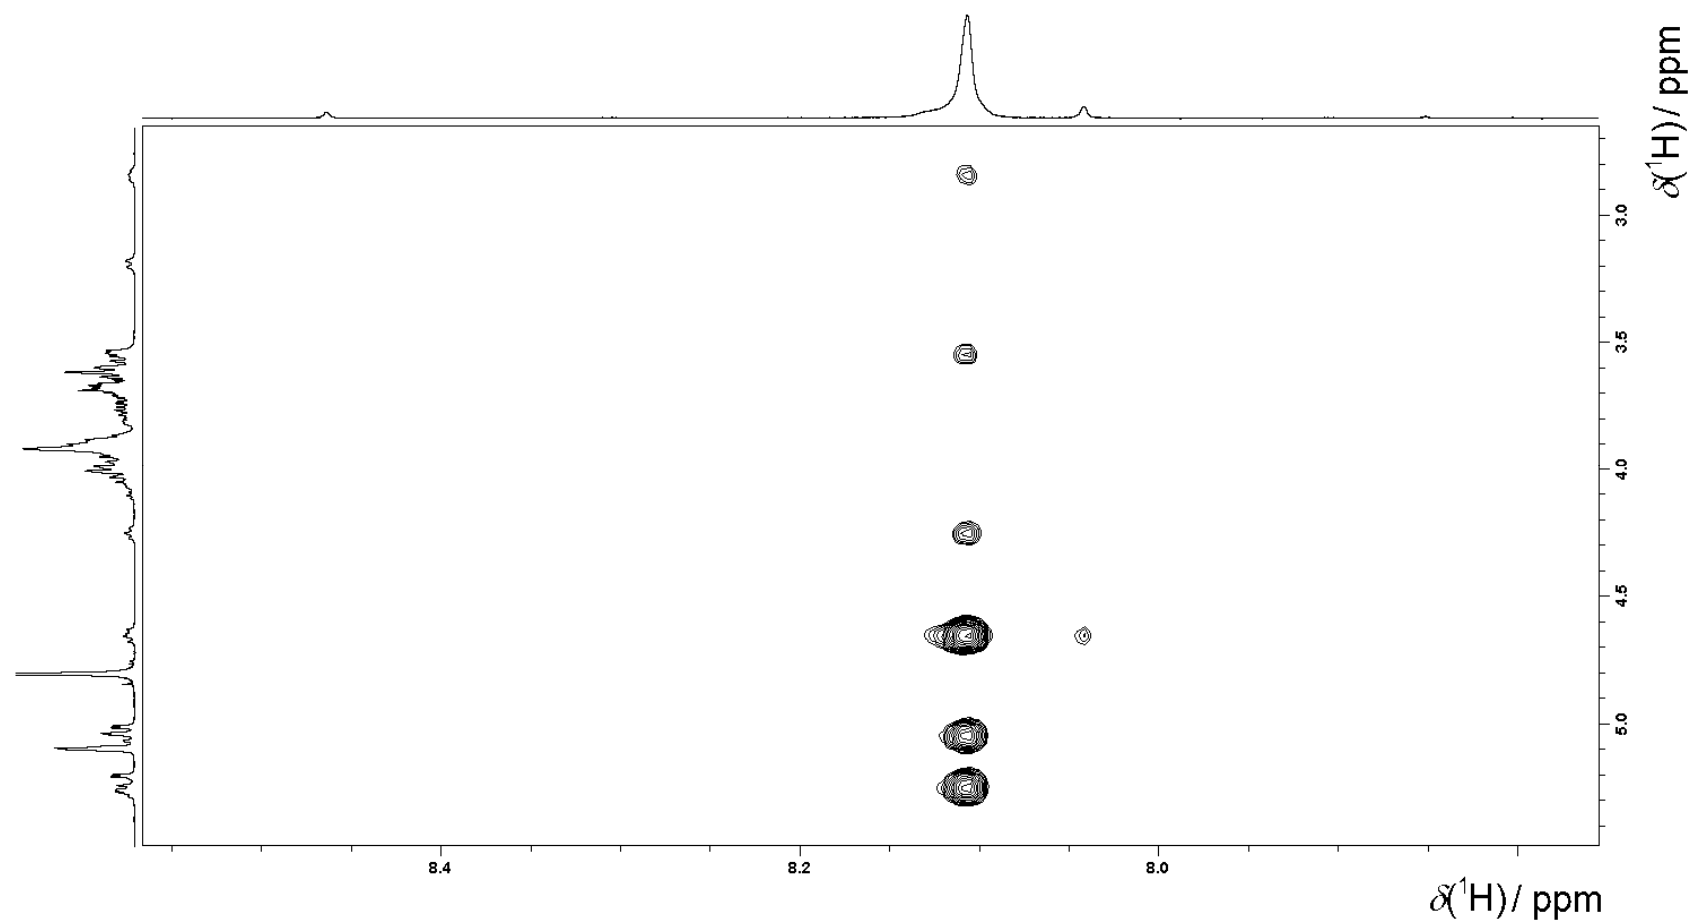

**Figure S3.** The spectral region of the  $^1\text{H}$  NOESY spectrum given in Fig. S2 showing the interaction between AQ2S and  $\beta$ -CDGAL.

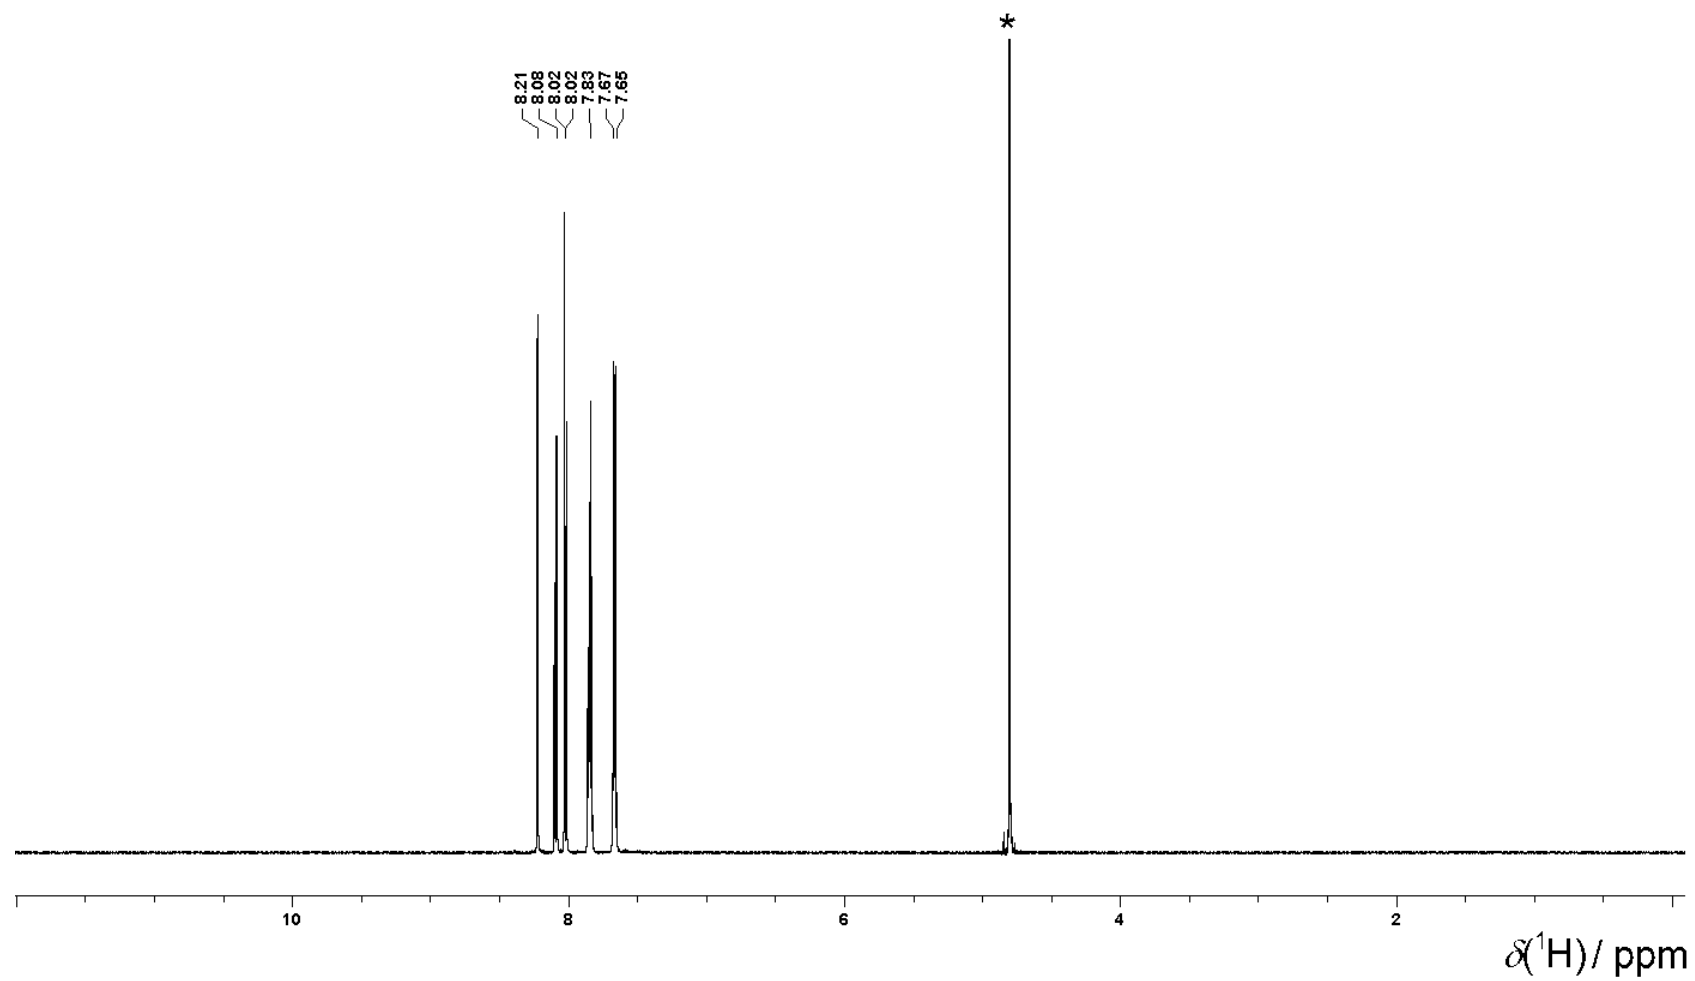

**Figure S4.**  $^1\text{H}$  NMR spectrum of antraquinone-2-sulfonic acid (AQ2S) dissolved in  $\text{D}_2\text{O}$ . The residual solvent peak at  $\delta(^1\text{H}) = 4.79$  ppm is marked by an asterisk.

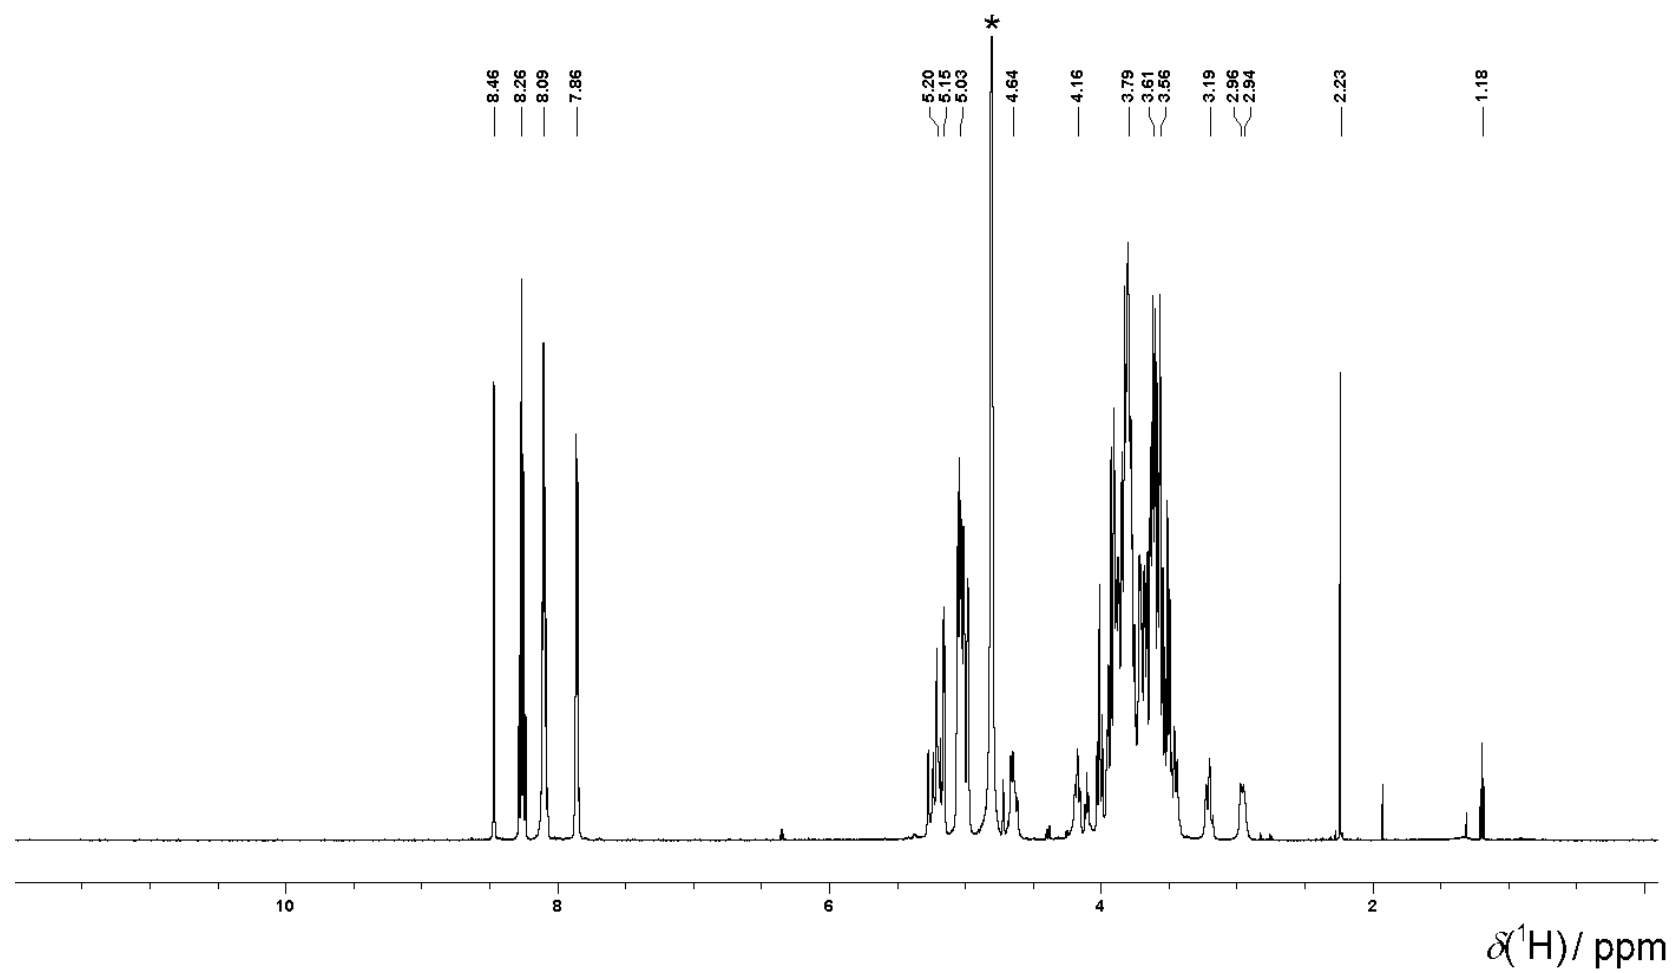

**Figure S5.**  $^1\text{H}$  NMR spectrum of an equimolar mixture of AQ2S and  $\beta$ -CDGAL dissolved in  $\text{D}_2\text{O}$ . The residual solvent peak at  $\delta(^1\text{H}) = 4.79$  ppm is marked by an asterisk.

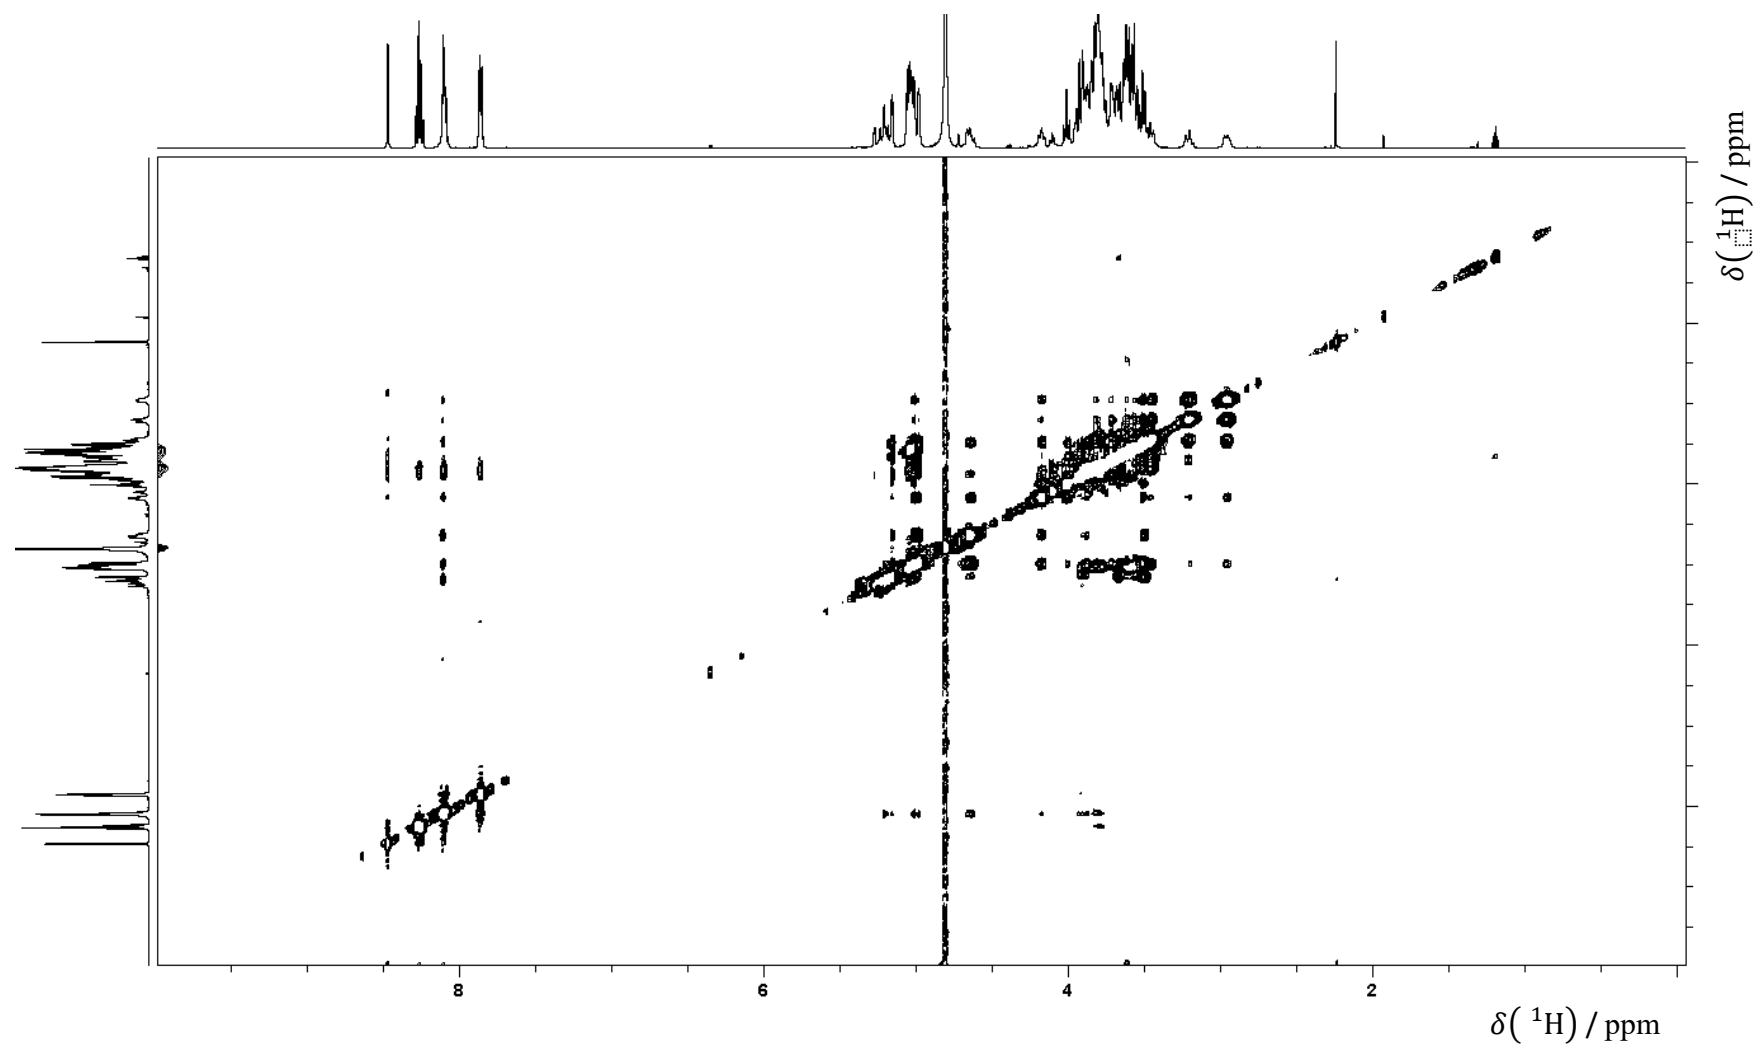

**Figure S6.**  $^1\text{H}$  NOESY spectrum of an equimolar mixture of AQ2S and  $\beta$ -CDGAL dissolved in  $\text{D}_2\text{O}$ .

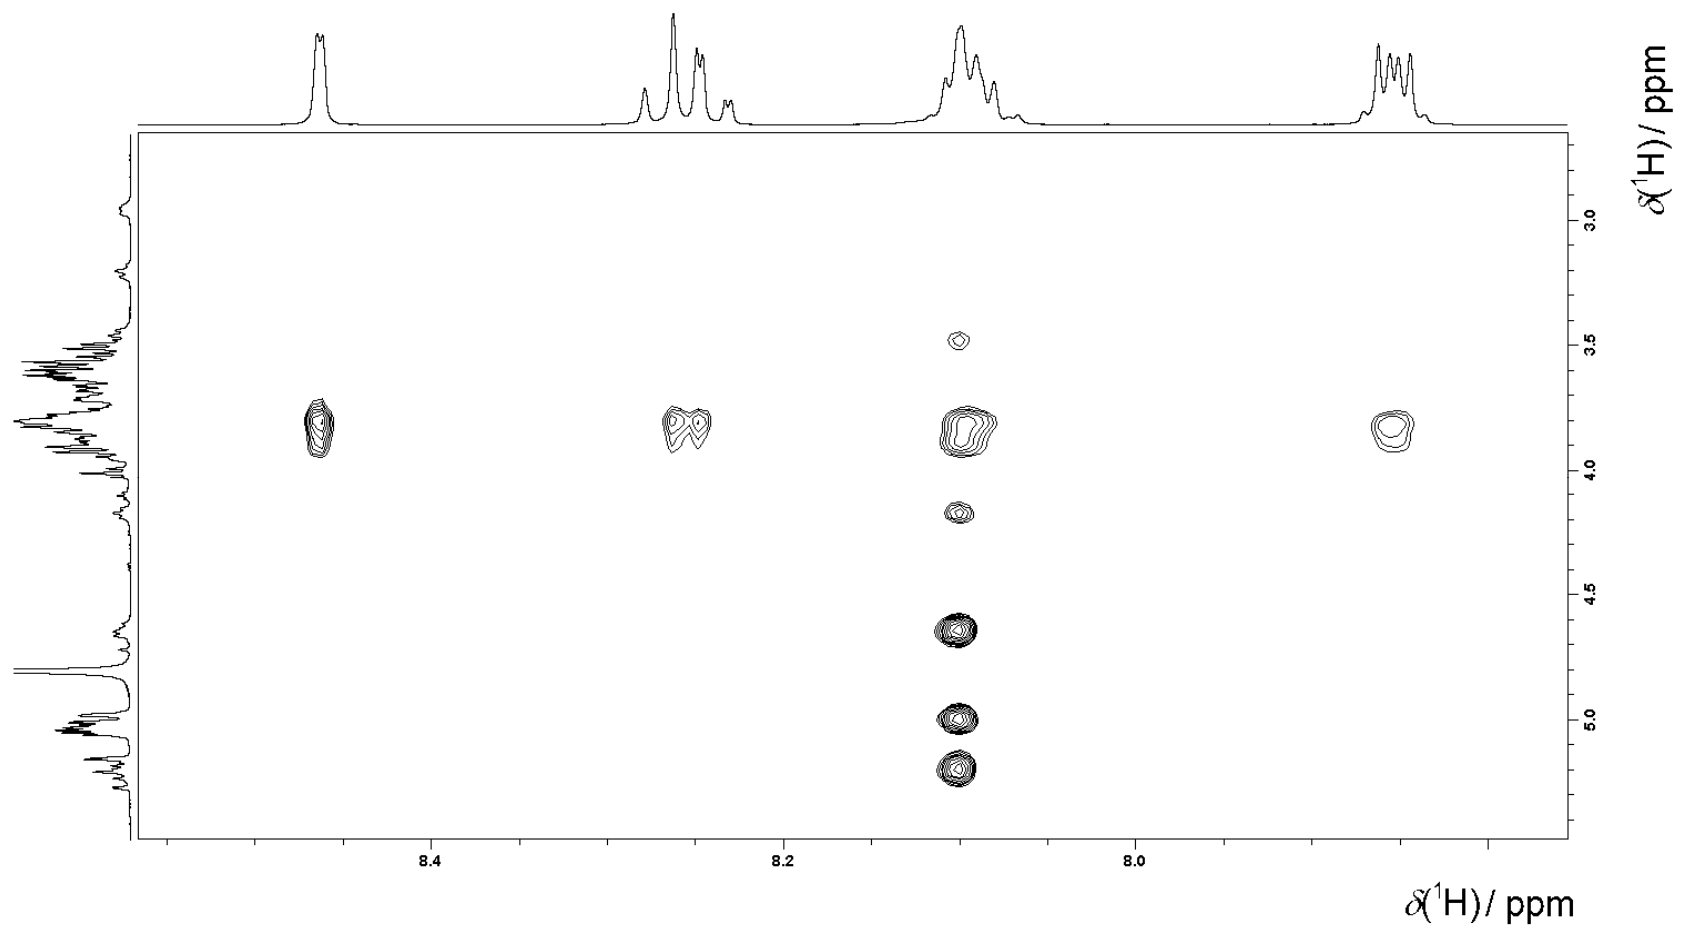

**Figure S7.** The spectral region of the  $^1\text{H}$  NOESY spectrum given in Fig. S6 showing the interaction between AQ2S and  $\beta$ -CDGAL.

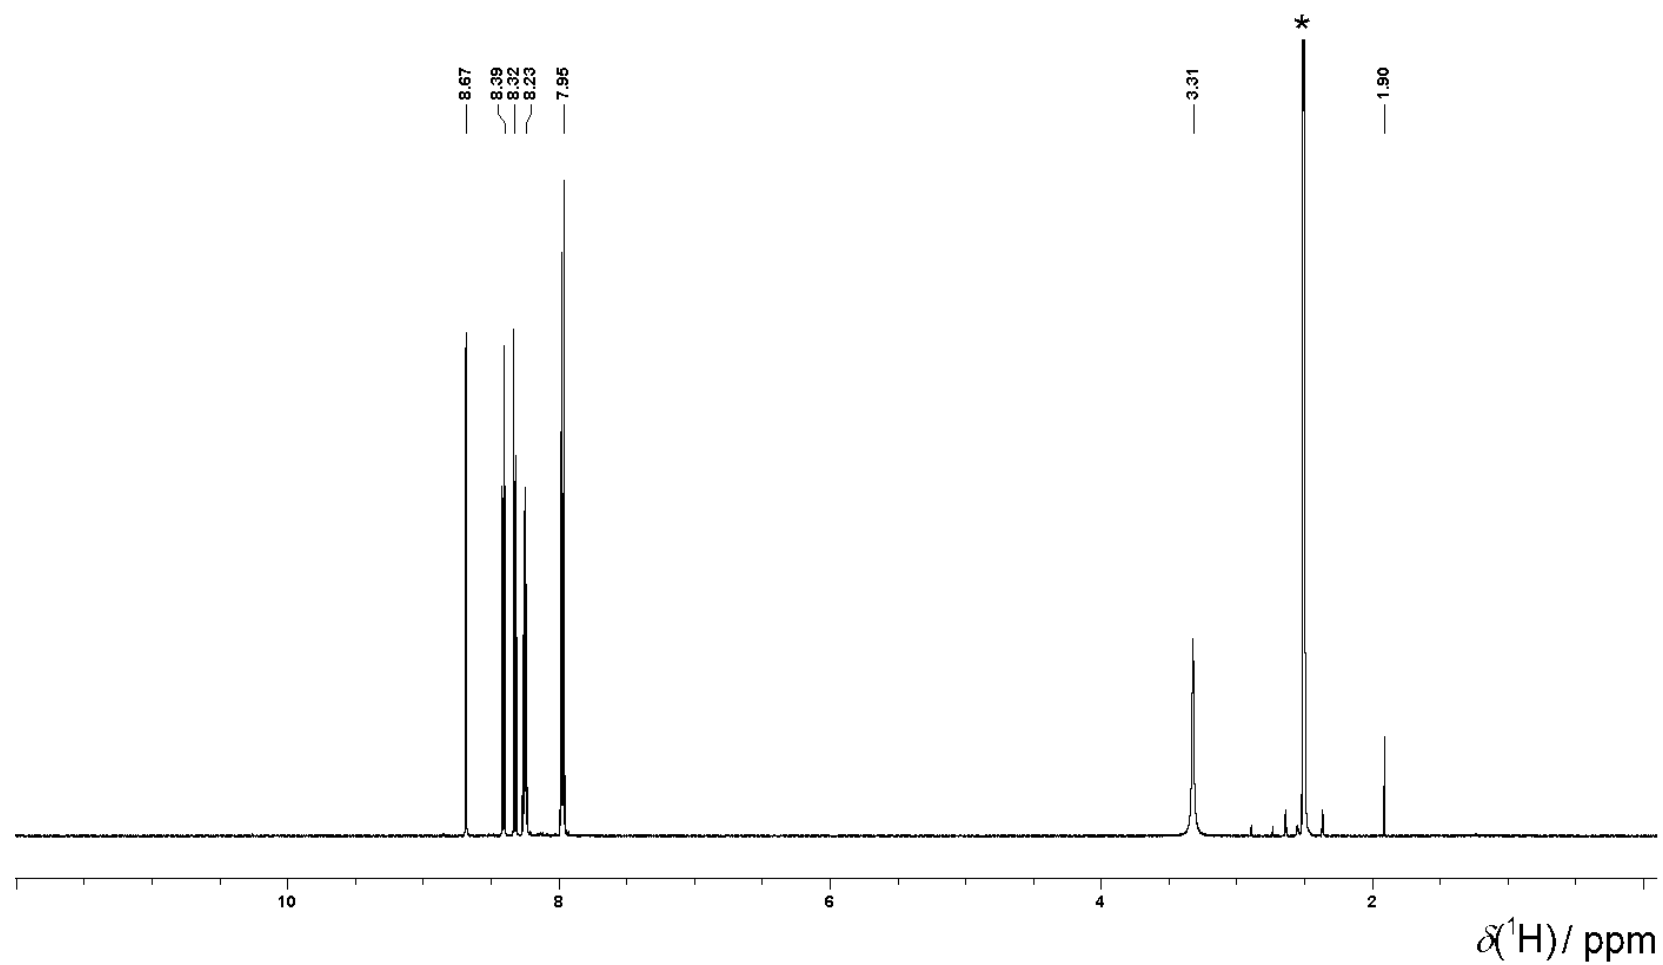

**Figure S8.**  $^1\text{H}$  NMR spectrum of antraquinone-2-carboxylic acid (AQ2CA) dissolved in  $\text{DMSO-}d_6$ . The residual solvent peak at  $\delta(^1\text{H}) = 2.50$  ppm is marked by an asterisk.

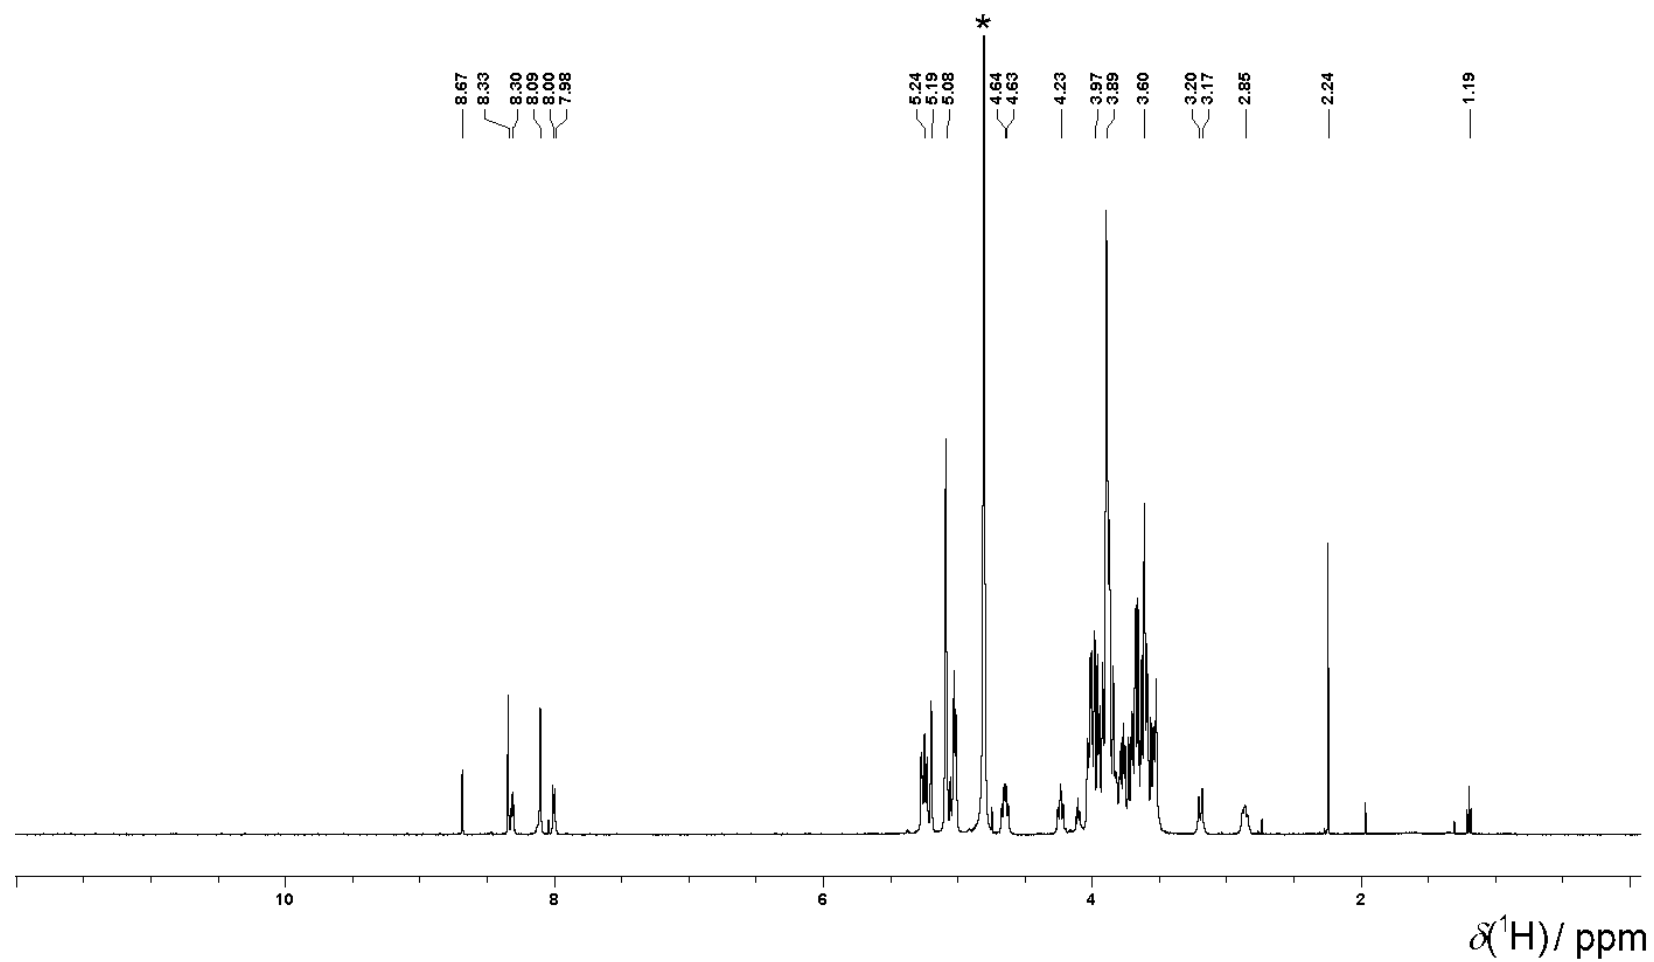

**Figure S9.**  $^1\text{H}$  NMR spectrum of an equimolar mixture of AQ2CA and  $\beta$ -CDGAL dissolved in  $\text{D}_2\text{O}$ . The residual solvent peak at  $\delta(^1\text{H}) = 4.79$  ppm is marked by an asterisk.

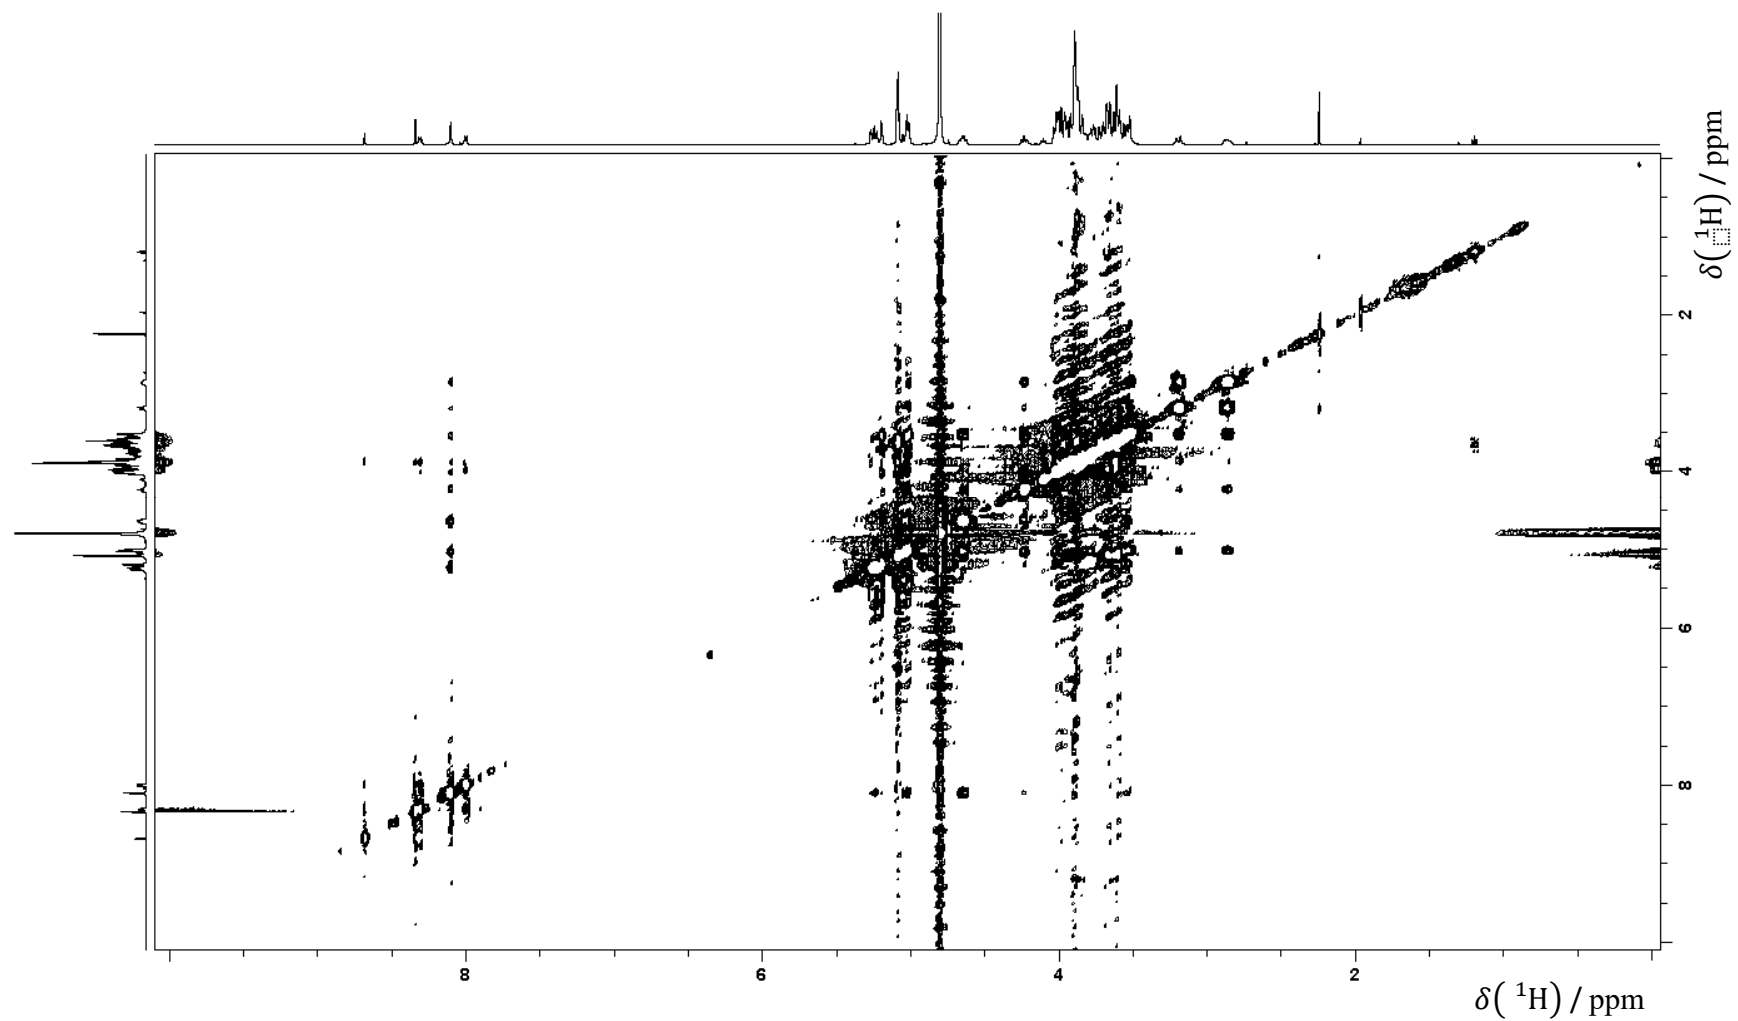

**Figure S10.**  $^1\text{H}$  NOESY spectrum of an equimolar mixture of AQ2CA and  $\beta$ -CDGAL dissolved in  $\text{D}_2\text{O}$ .

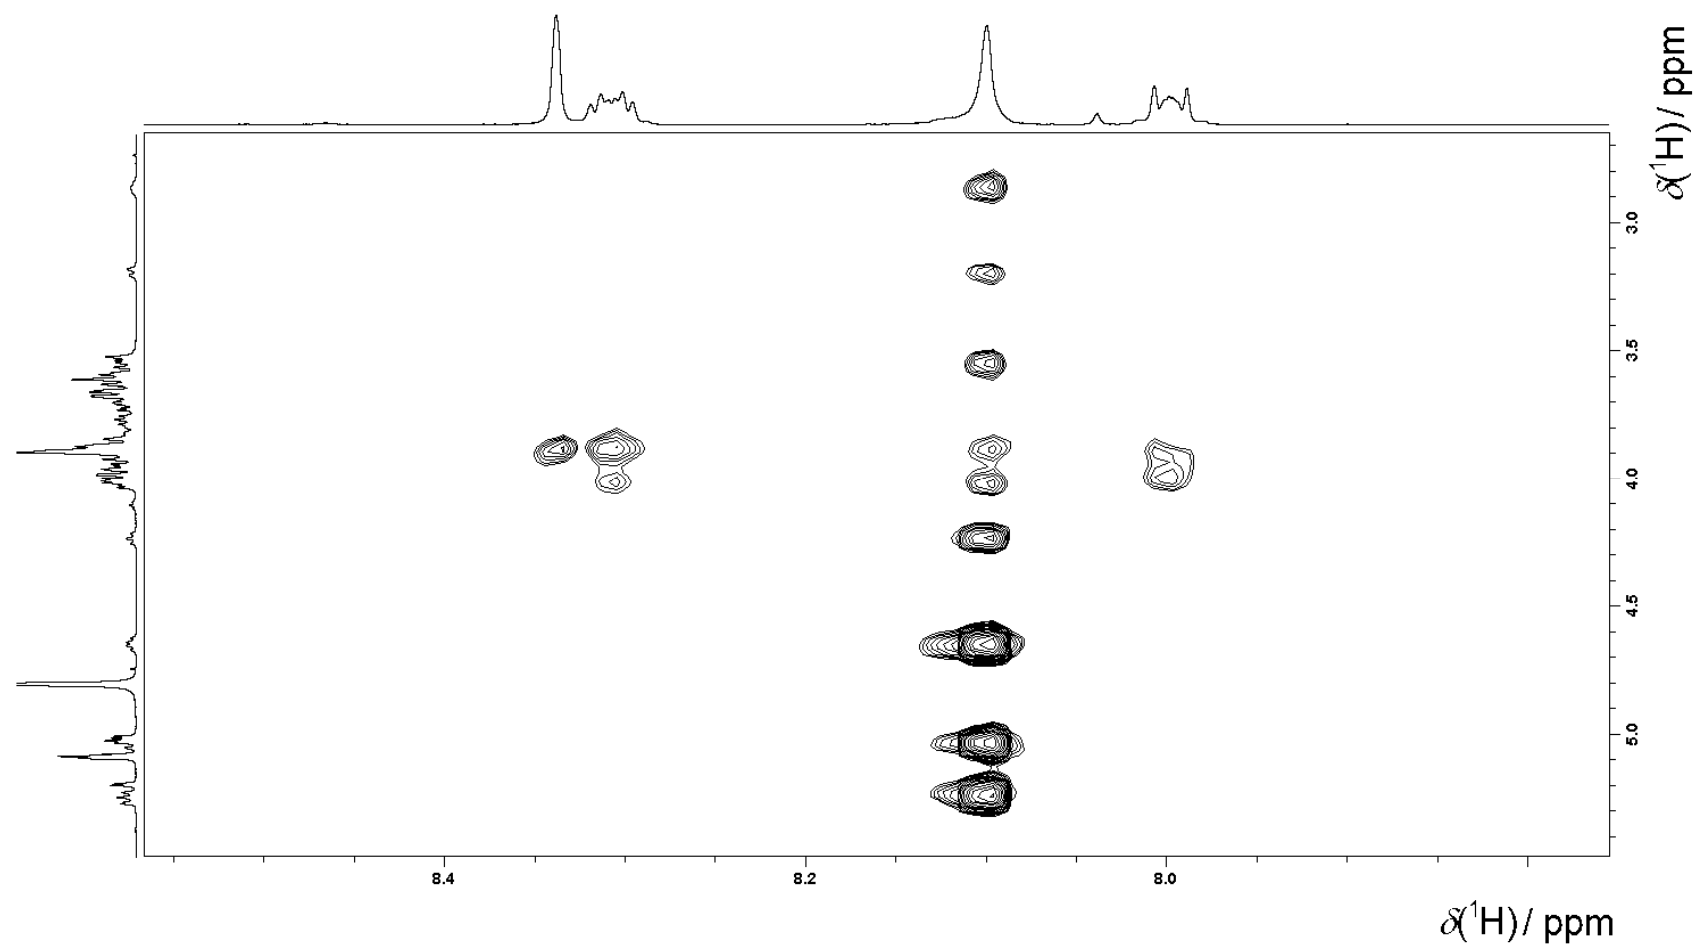

**Figure S11.** The spectral region of the  $^1\text{H}$  NOESY spectrum given in Fig. S10 showing the interaction between AQ2S and  $\beta$ -CDGAL.

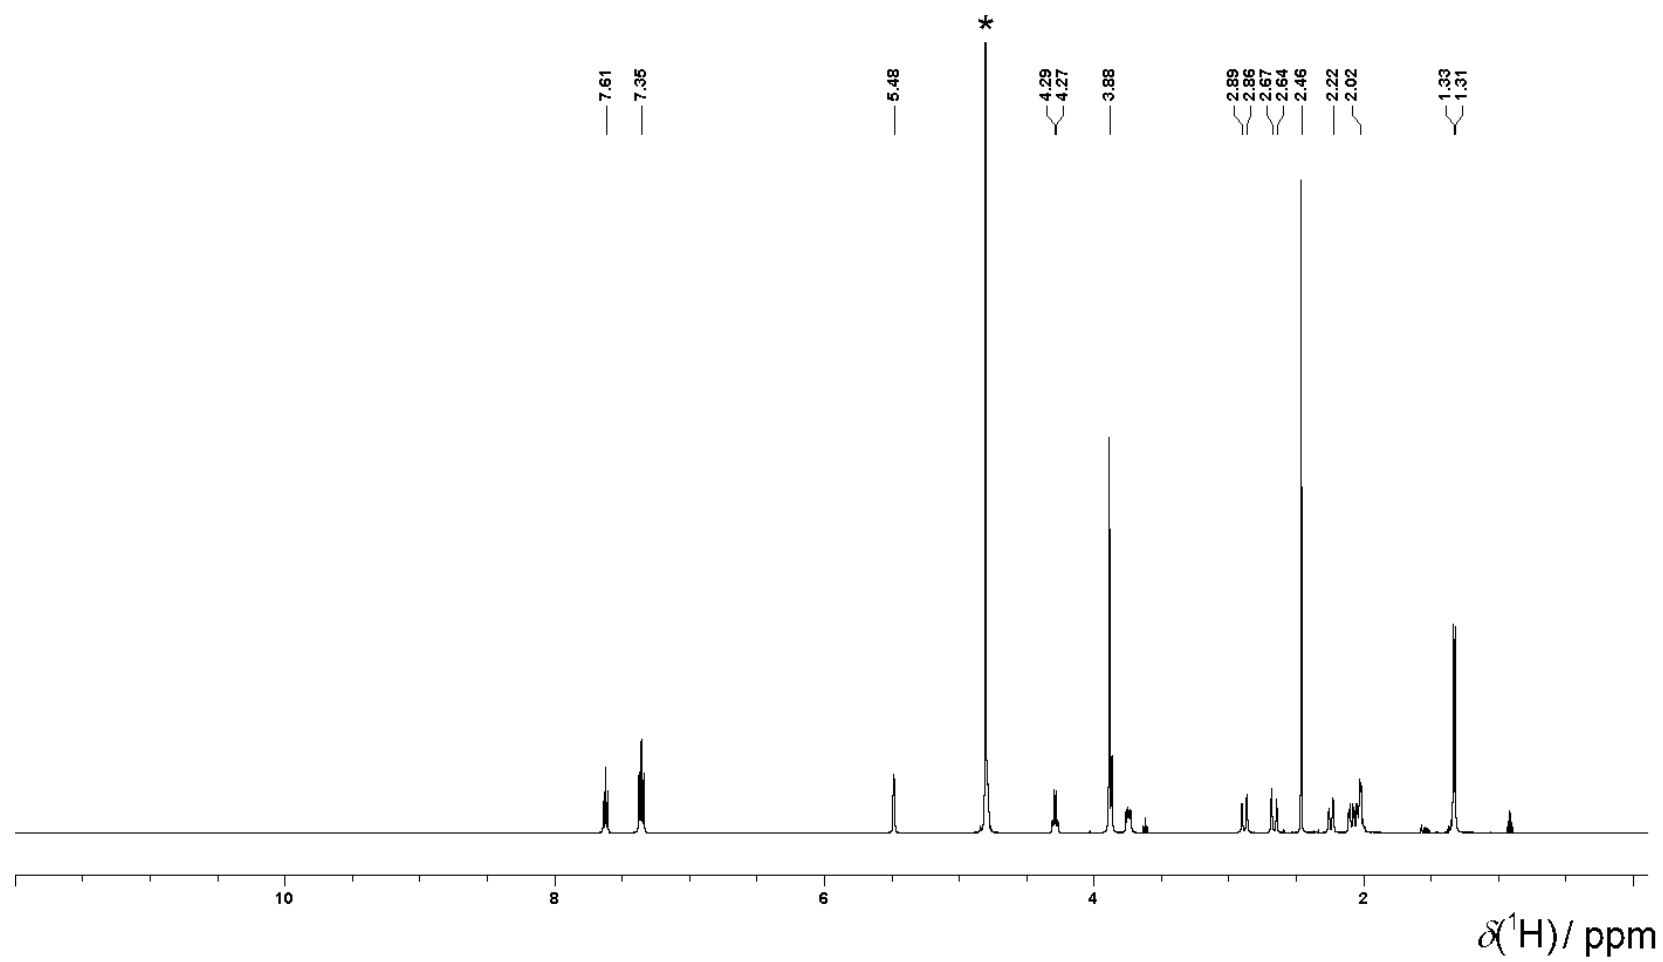

**Figure S12.**  $^1\text{H}$  NMR spectrum of daunorubicin (DNR) dissolved in  $\text{D}_2\text{O}$ . The residual solvent peak at  $\delta(^1\text{H}) = 4.79$  ppm is marked by an asterisk.

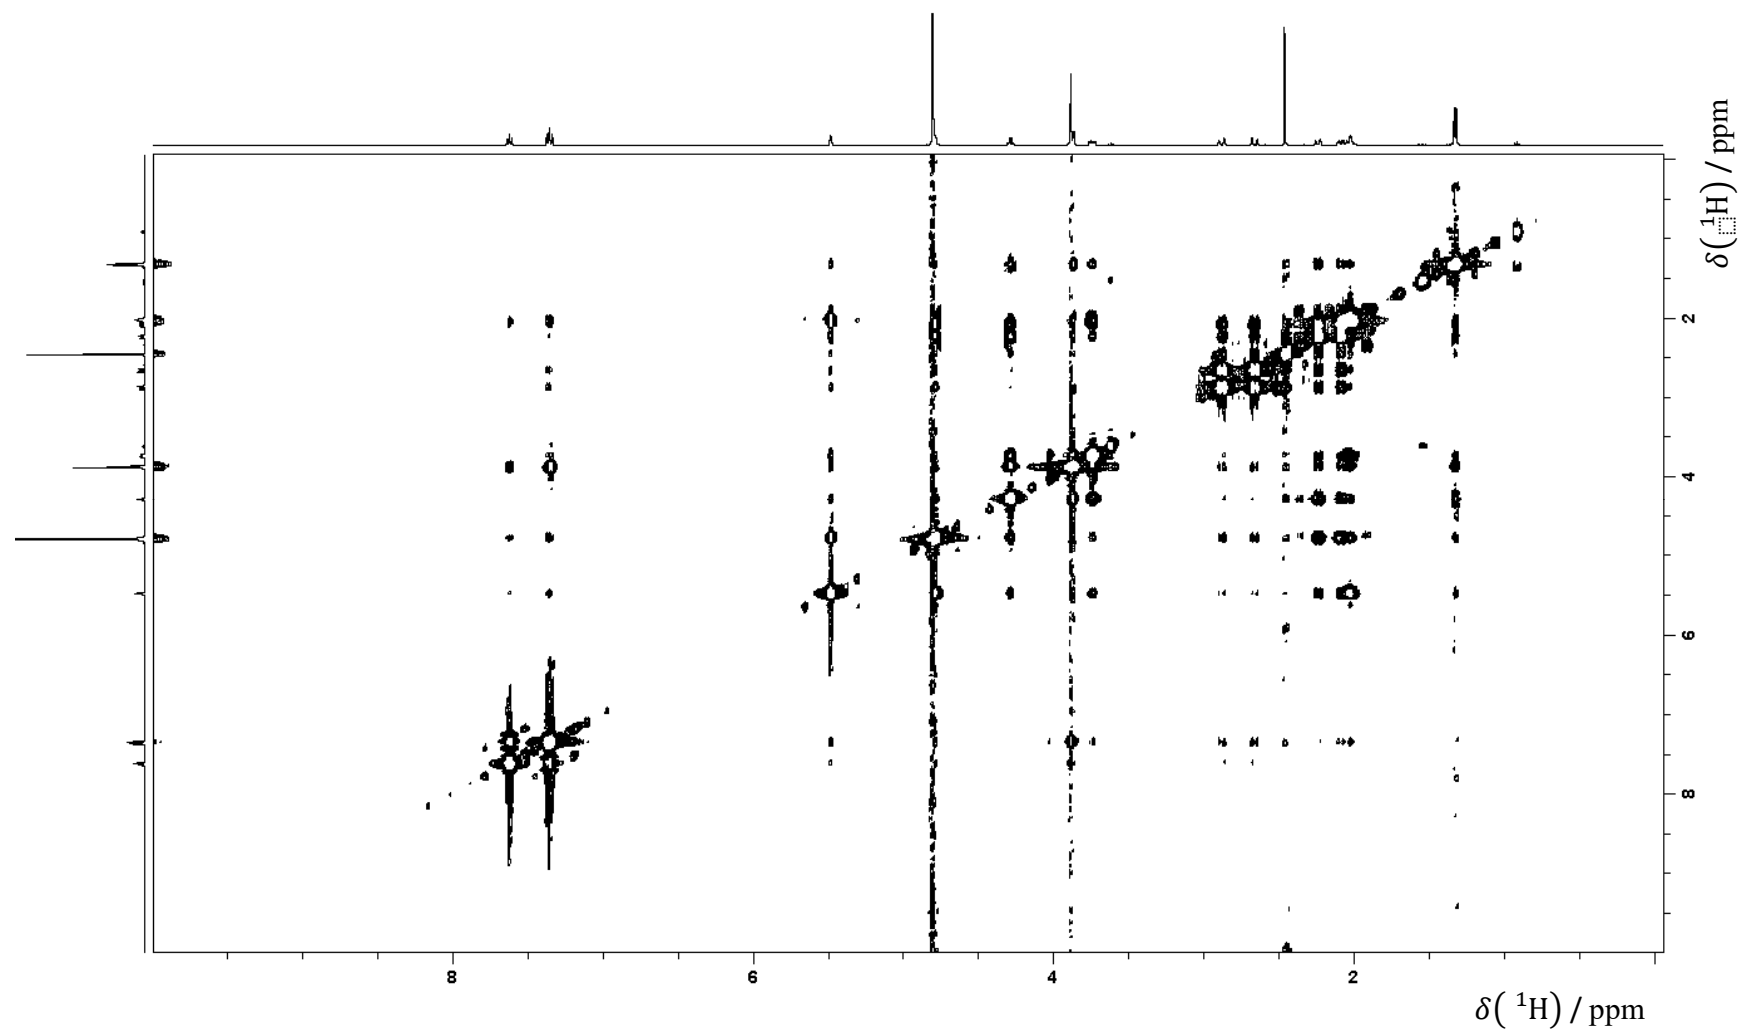

**Figure S13.**  $^1\text{H}$  NOESY spectrum of DNR dissolved in  $\text{D}_2\text{O}$ .

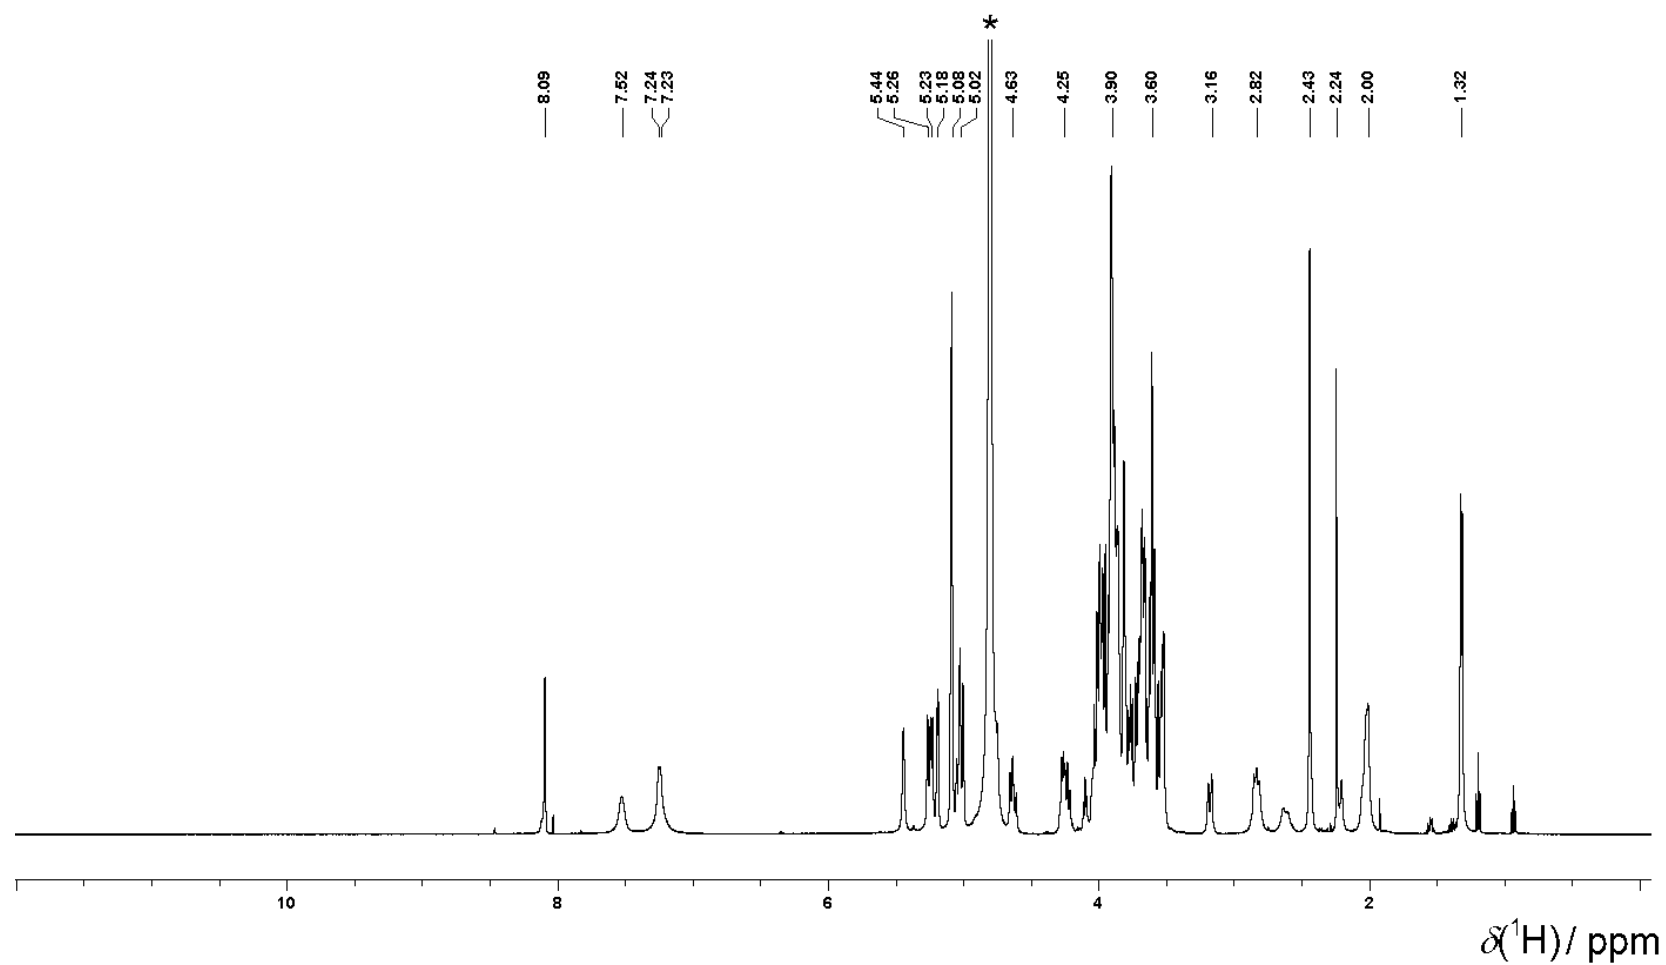

**Figure S14.**  $^1\text{H}$  NMR spectrum of an equimolar mixture of DNR and  $\beta$ -CDGAL dissolved in  $\text{D}_2\text{O}$ . The residual solvent peak at  $\delta(^1\text{H}) = 4.79$  ppm is marked by an asterisk.

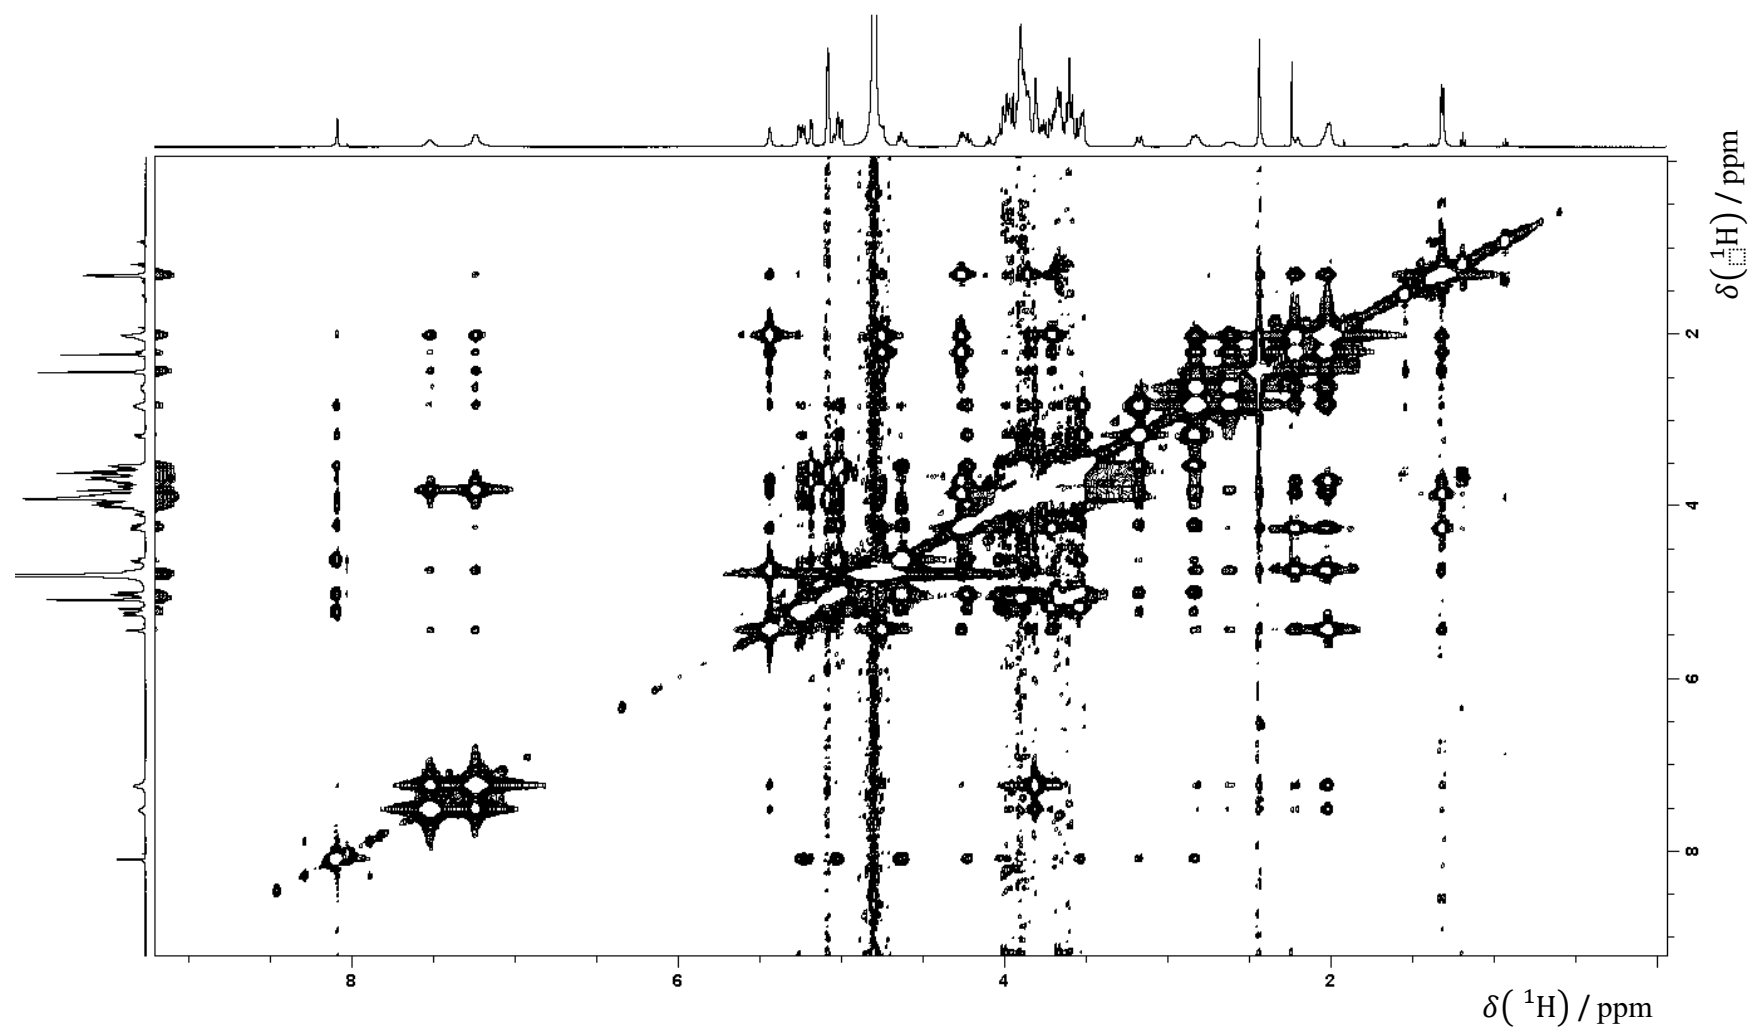

**Figure S15.**  $^1\text{H}$  NOESY spectrum of an equimolar mixture of DNR and  $\beta$ -CDGAL dissolved in  $\text{D}_2\text{O}$ .
